# Supplementary material for: Development of a facile and sensitive method for detecting alkaline phosphatase activity in serum with fluorescent gold nanoclusters based on the inner filter effect
Source: Royal Society of Chemistry journal article supplement (doi:10.1039/d0an00052c), 2020-01-01
Supplement: d0an00052c1.pdf [file d0an00052c1.pdf]

# Development of a Facile and Sensitive Method for Detecting Alkaline Phosphatase Activity in Serum with Fluorescent Gold Nanoclusters based on the inner filter effect

Shengda Qi<sup>a</sup>, Huanhuan Zheng<sup>a</sup>, Hongyan Qin<sup>b</sup>, Honglin Zhai<sup>a,\*</sup>

<sup>a</sup> College of Chemistry and Chemical Engineering, Lanzhou University, Lanzhou 730000, People's Republic of China

<sup>b</sup> Department of Pharmacy, First Hospital of Lanzhou University, Lanzhou 730000, People's Republic of China

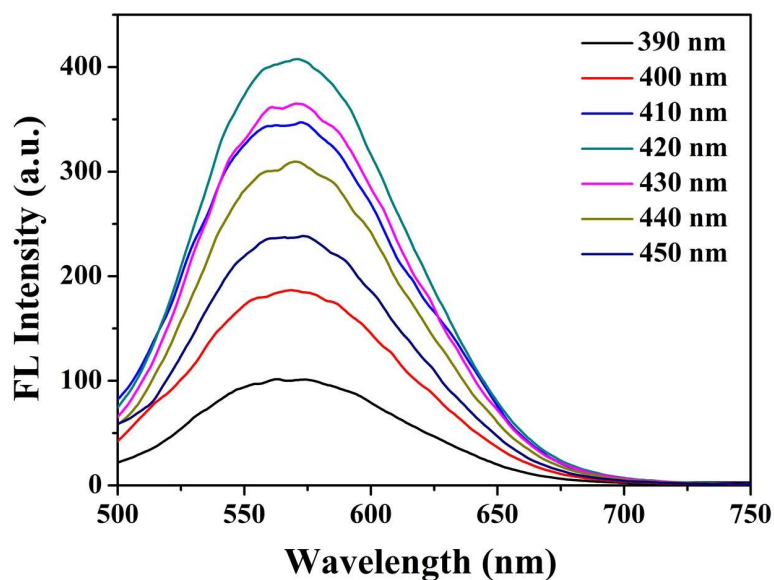

**Figure S1.** Fluorescence emission spectra of the AuNCs at various excitation wavelengths.

---

\* Corresponding author. Fax: +86-931-8912582.

E-mail address: zhaihl@163.com.

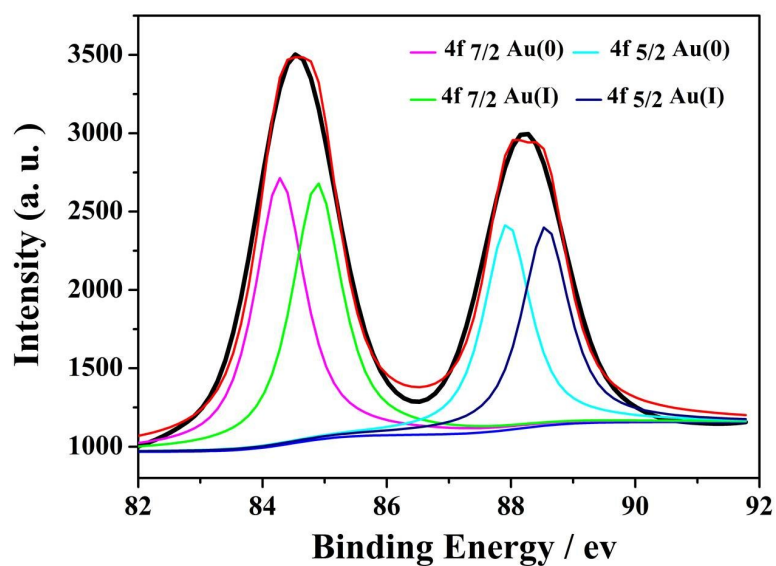

**Figure S2.** Au 4f XPS spectrum of AuNCs. Blank line: experimental spectrum; red line: fitted spectrum.

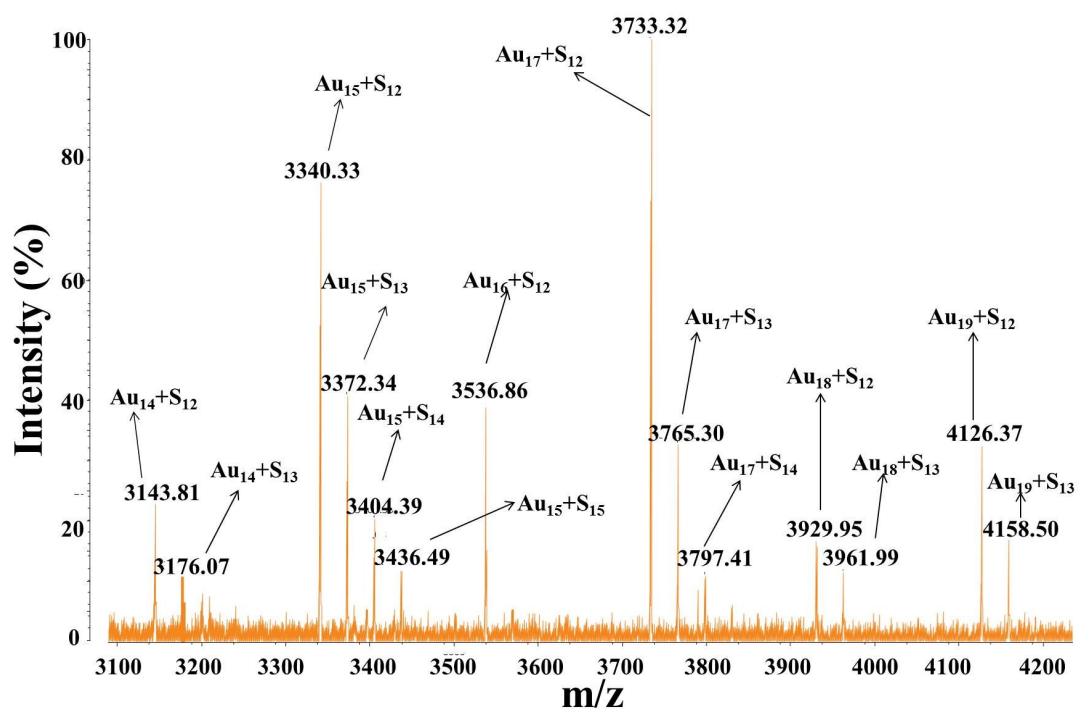

**Figure S3.** MALDI-TOF/TOF MS spectrum of the AuNCs using DCTB as a matrix in the negative-ion mode.

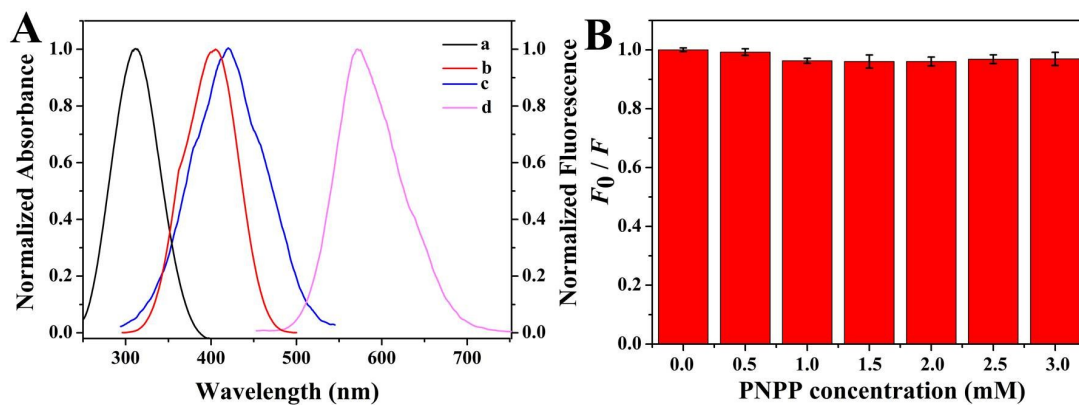

**Figure S4.** (A) Absorption spectrum of (a) p-nitrophenylphosphat, (b) p-nitrophenol and fluorescence (c) excitation spectrum, (d) emission spectrum of AuNCs. (B) The fluorescence change of AuNCs upon addition of various concentrations of PNPP from 0 to 3 mM.

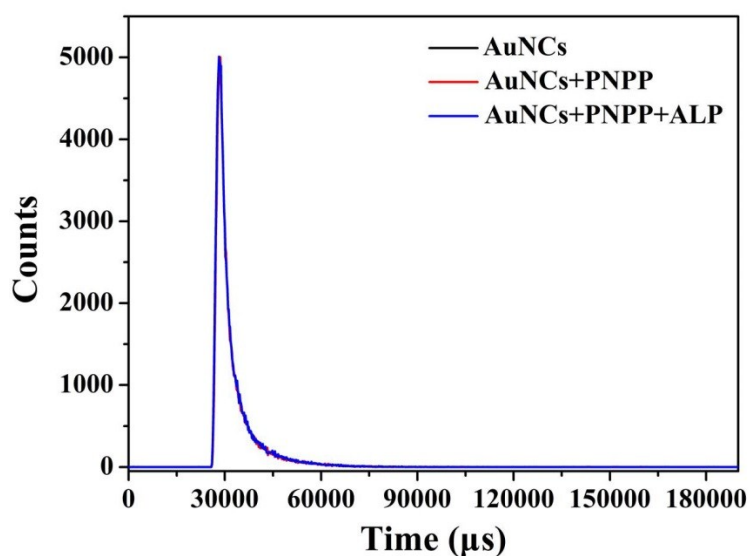

**Figure S5.** Time-resolved decay curves of AuNCs in the absence and presence of PNPP (1 mM), and in the presence of PNPP (1 mM) with ALP (5 U/L).

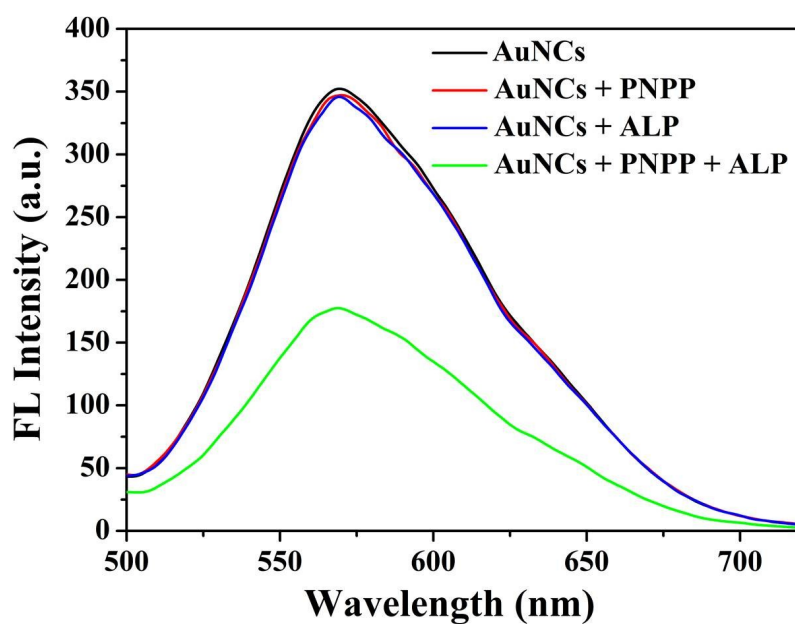

**Figure S6.** Fluorescence spectra of AuNCs (black line) in the presence of 1.0 mM PNPP (red line), 5.0 U/L ALP (blue line) and 1.0 mM PNPP + 5.0 U/L ALP (green line).

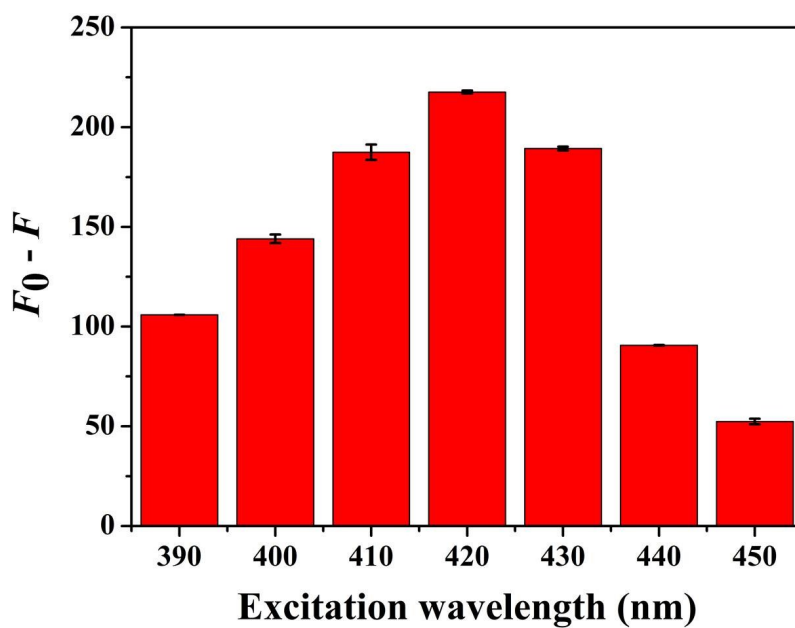

**Figure S7.** Fluorescence intensity change of AuNCs at different excitation wavelengths.  $F_0$  and  $F$  are the fluorescence intensities of AuNCs in the absence and presence of ALP (5 U/L), respectively.

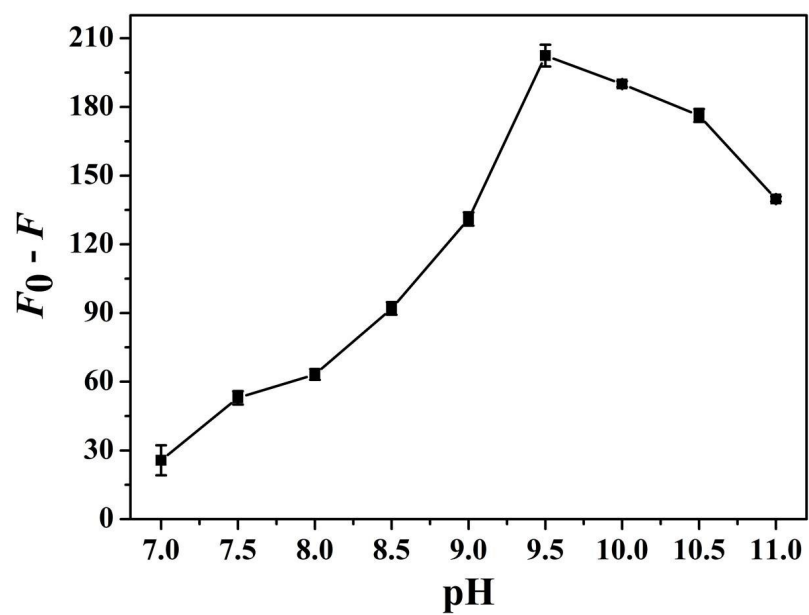

**Figure S8.** Fluorescence intensity change of AuNCs at different pH of Tris-HCl buffer.

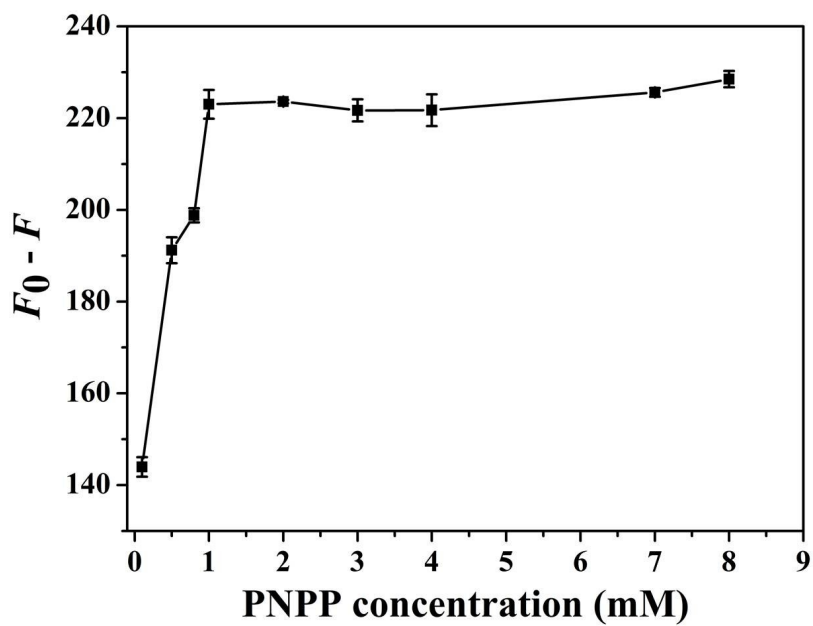

**Figure S9.** Optimization of the concentration of PNPP.

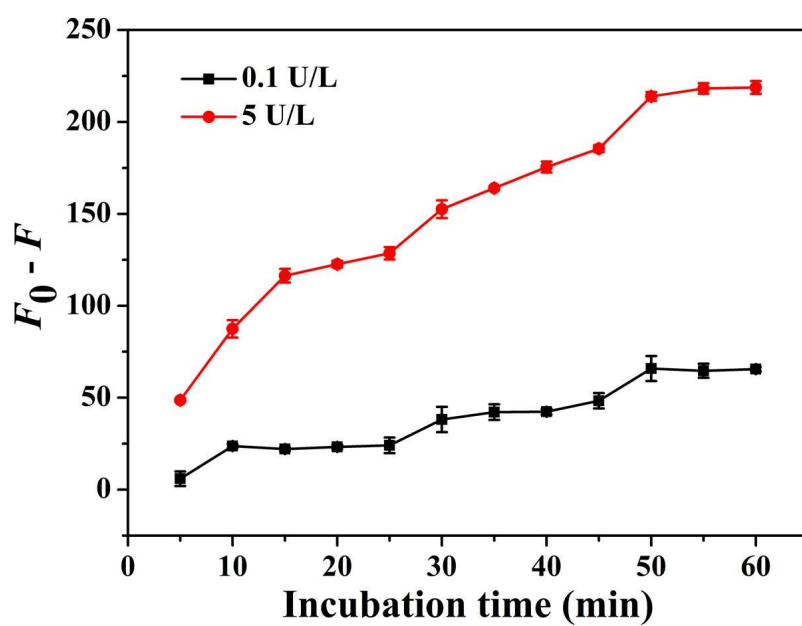

**Figure S10.** Incubation time in the presence of ALP.

**Table S1.** Influence of PNPP and PNPP+ALP on fluorescence lifetime of AuNCs

| System         | $\langle \tau \rangle$ ( $\mu\text{s}$ ) |                            |       |                            |      |
|----------------|------------------------------------------|----------------------------|-------|----------------------------|------|
|                | $a_1$                                    | $\tau_1$ ( $\mu\text{s}$ ) | $a_2$ | $\tau_2$ ( $\mu\text{s}$ ) | )    |
| AuNCs          | 0.58                                     | 1.16                       | 0.42  | 4.8                        | 2.69 |
| AuNCs+PNPP     | 0.62                                     | 1.26                       | 0.38  | 4.91                       | 2.65 |
| AuNCs+PNPP+ALP | 0.63                                     | 1.21                       | 0.37  | 5.15                       | 2.67 |
